# Supplementary material for: Clinical Significance of Germline Cancer Predisposing Variants in Unselected Patients with Pancreatic Adenocarcinoma
Source: PubMed Central journal article supplement (PMC7827324; doi:10.3390/cancers13020198), 2021-01-08
Supplement: cancers-13-00198-s001.pdf [file cancers-13-00198-s001.pdf]

Article

# Clinical Significance of Germline Cancer Predisposing Variants in Unselected Patients with Pancreatic Adenocarcinoma

## 1. PreSENTIA™ pan-cancer panel

*APC, ATM, BAP1, BARD1, BMPR1A, BRCA1, BRCA2, BRIP1, CDH1, CDK4, CDKN2A (CDKN2A<sub>p16</sub>(INK4A), CDKN2A<sub>p14</sub>(ARF)), CHEK2, DDB2, DICER1, EPCAM, ERCC1, ERCC2, ERCC3, ERCC4, ERCC5, FANCA, FANCB, FANCC, FANCD2, FANCE, FANCF, FANCG, FANCL, FANCL, FANCM, GREM1, HOXB13, MEN1, MLH1, MRE11, MSH2, MSH6, MUTYH, NBN, PALB2, PMS2, POLD1, POLE, POLH, PTEN, RAD50, RAD51C, RAD51D, RB1, RET, SDHAF2, SDHB, SDHC, SDHD, SLX4, SMAD4, SMARCA4, STK11, TP53, VHL, XPA, XPC.*

## 2. Multigene testing

Genomic deoxyribonucleic acid (gDNA) was extracted using a standardized methodology and subjected to mechanical fragmentation prior to DNA library preparation. DNA libraries were then prepared based on previously established protocols.<sup>1</sup> DNA enrichment for the genomic regions of interest was carried out using a solution-based hybridization method with TACS (Target Capture Sequences) (NIPD Genetics™). TACS were designed to capture selected loci in the genes of interest and were biotinylated after being generated by PCR. Biotinylated TACS were then immobilized on streptavidin coated magnetic beads for subsequent hybridization with the DNA libraries. Enriched DNA libraries were then normalized and were subjected to paired-end sequencing using manufacturer's protocols. PreSENTIA™ pan-cancer panel was used for the identification of SNVs, small Indels ( $\leq 20$ bp) and CNVs. All 549 germline DNA samples fulfilled the quality control criteria for SNV and Indel calling. Out of 549 germline DNA samples, 434 samples that their DNA quality was not affected by the sample's long-term storage were also subjected to CNV analysis using the abovementioned next-generation sequencing approach for all 62 genes.

## 3. Bioinformatics and Data Analysis

Sequencing data were de-multiplexed and aligned to the human genome build (hg19) using BWA-MEM to generate alignment (BAM) files. Specifically, for each sample, paired-end DNA sequencing reads were processed to remove adapter sequences and poor-quality reads. The remaining sequences were aligned to the human reference genome build hg19 using the Burrows-Wheeler alignment algorithm (BWA-MEM). Duplicate read entries were removed to convert aligned reads to a binary (BAM) file containing uniquely aligned read entries only. Per base allele-specific read-depth information was retrieved from this final BAM file. Variant calling was performed following GATK Best Practices workflow that implements local realignment and base quality score re-calibration.<sup>2</sup> Classification and interpretation of variants was conducted according to established guidelines provided by the American College of Medical Genetics and Genomics and the Association for Molecular Pathology<sup>3</sup> and was in line with ClinVar database.<sup>4</sup>

Germline CNV calling is performed using custom-build application programming interfaces (APIs) written in the Python and R programming languages (Python Software Foundation (2015) Python 2.7; The R Foundation (2015) The R Project for Statistical Computing v3.4.3). Pileup information on targeted bases is used to get probe-level read depth information. The statistical analysis for CNV detection at very high resolution is performed by a two-step (within and between samples) normalization method. The first step involves normalization of probe read depths using their expected value, which is estimated by fitting a local constant regression model on the probe read depths versus the

probe GC fraction. For each tested sample, an optimal subset of reference sample among a total of at least 100 reference samples is chosen to be used in the second normalization step. To this end, we developed a novel machine learning based method to identify said optimal subsets based on the enrichment similarity between the tested and reference samples and relies on principles of the k-nearest neighbors (KNN) machine learning classification algorithm. At this step, a subset of the reference samples is classified as similar to the tested sample and subsequently used as normalizers to get the final probe-level risk scores (Supplementary figure 1). Regions in the human genome containing repeats, pseudogenes and extreme GC-content have been excluded because they cannot be analyzed using short read sequencing. Each positive CNV or sequence variant call is confirmed with an orthogonal method.

P/LPV allele frequency analysis: Reference population frequency data were retrieved from the gnomAD population database containing both exome and genome sequencing data from a wide variety of large-scale sequencing projects.<sup>5</sup> The allele frequencies of the five most abundant P/LPVs in genes associated with low hereditary cancer risk (MUTYH, RAD50 and CHEK2) were compared against population groups with the highest frequency for each P/LPV using one-sided Fisher's exact test. Although this conservative approach lowers the risk for a type I error in our hypothesis testing, in the absence of multiple comparisons p-value correction (we have tested many genes at significance level 0.05), the results should only be treated as suggestive for further investigation. We did not apply a false discovery correction (this would render all p-values non-significant) since at this stage and given the design of the study (not a case-control study), we aimed at high sensitivity. By taking the conservative approach of testing against the population group with the highest frequency for each P/LPV, we maximized the probability of the true differences in frequencies to be statistically significant for our testing cohort even if its true frequency was lower than the one used.

**Table S1.** Pathogenic/Likely pathogenic variants reported per patient.

| Patient ID | Transcript ID  | Gene  | CDS change          | Amino acid change   | Effect on RNA splicing pattern | Zygoty       | ACMG Classification | ClinVar interpretation       |
|------------|----------------|-------|---------------------|---------------------|--------------------------------|--------------|---------------------|------------------------------|
| PNC324     | NM_000038.5    | APC   | c.2612delG          | p.Gly871Glufs       |                                | Heterozygous | Pathogenic          | Pathogenic                   |
| 204116WB   | NM_000051.3    | ATM   | c.8585-2A>C         |                     | abnormal splicing              | Heterozygous | Pathogenic          | Likely Pathogenic/Pathogenic |
| 206983WB   | NM_000051.3    | ATM   | c.67C>T             | p.Arg23Ter          |                                | Heterozygous | Pathogenic          | Pathogenic                   |
| 207664WB   | NM_000051.3    | ATM   | c.8766dupT          | p.Val2923CysfsTer2  |                                | Heterozygous | Pathogenic          | No ClinVar submission        |
| 207739WB   | NM_000051.3    | ATM   | c.8585-2A>C         |                     | abnormal splicing              | Heterozygous | Pathogenic          | Likely Pathogenic/Pathogenic |
| 207743WB   | NM_000051.3    | ATM   | c.5979_5983delTAAAG | p.Ser1993ArgfsTer23 |                                | Heterozygous | Pathogenic          | Pathogenic                   |
| 213578BS   | NM_000051.3    | ATM   | c.432dupA           | p.Leu145ThrfsTer14  |                                | Heterozygous | Pathogenic          | Likely Pathogenic/Pathogenic |
| PNC270     | NM_000051.3    | ATM   | c.1215delT          | p.Asn405LysfsTer15  |                                | Heterozygous | Pathogenic          | Likely Pathogenic/Pathogenic |
| PNC354     | NM_000051.3    | ATM   | exon2-4 deletion    |                     |                                | Heterozygous | Pathogenic          | Pathogenic                   |
| PNC436     | NM_000051.3    | ATM   | c.2250G>A           | p.Lys750=           | abnormal splicing              | Heterozygous | Pathogenic          | Likely Pathogenic/Pathogenic |
| PNC534     | NM_000051.3    | ATM   | c.1655delC          | p.Pro552GlnfsTer4   |                                | Heterozygous | Pathogenic          | Likely Pathogenic/Pathogenic |
| PNC538     | NM_000051.3    | ATM   | c.5979_5983delTAAAG | p.Ser1993ArgfsTer23 |                                | Heterozygous | Pathogenic          | Pathogenic                   |
| PNC234     | NM_007294.3    | BRCA1 | c.329delA           | p.Lys110ArgfsTer9   |                                | Heterozygous | Pathogenic          | Pathogenic                   |
| PNC234     | NM_001128425.1 | MUTYH | c.734G>A            | p.Arg245His         |                                | Heterozygous | Likely Pathogenic   | Likely Pathogenic/Pathogenic |
| PNC323     | NM_007294.3    | BRCA1 | c.5251C>T           | p.Arg1751Ter        |                                | Heterozygous | Pathogenic          | Pathogenic                   |
| 207707WB   | NM_000059.3    | BRCA2 | c.2644delC          | p.Leu882PhefsTer13  |                                | Heterozygous | Pathogenic          | Pathogenic                   |
| 207745WB   | NM_000059.3    | BRCA2 | c.9117G>A           | p.Pro3039=          | abnormal splicing              | Heterozygous | Pathogenic          | Pathogenic                   |
| PNC150     | NM_000059.3    | BRCA2 | c.2339C>G           | p.Ser780Ter         |                                | Heterozygous | Pathogenic          | Pathogenic                   |
| PNC177     | NM_000059.3    | BRCA2 | c.4284dupT          | p.Gln1429SerfsTer9  |                                | Heterozygous | Pathogenic          | Pathogenic                   |
| PNC311     | NM_000059.3    | BRCA2 | c.2339C>G           | p.Ser780Ter         |                                | Heterozygous | Pathogenic          | Pathogenic                   |

|          |                |       |            |                     |              |                   |                                                                 |
|----------|----------------|-------|------------|---------------------|--------------|-------------------|-----------------------------------------------------------------|
| PNC393   | NM_000059.3    | BRCA2 | c.9027delT | p.His3010IlefsTer18 | Heterozygous | Pathogenic        | Pathogenic                                                      |
| PNC186   | NM_032043.2    | BRIP1 | c.633delT  | p.Gly212AlafsTer62  | Heterozygous | Pathogenic        | Pathogenic                                                      |
| PNC523   | NM_032043.2    | BRIP1 | c.2392C>T  | p.Arg798Ter         | Heterozygous | Pathogenic        | Likely pathogenic/Pathogenic/Uncertain significance             |
| 204106WB | NM_007194.4    | CHEK2 | c.470T>C   | p.Ile157Thr         | Heterozygous | Pathogenic        | Risk factor/Likely pathogenic/Pathogenic/Uncertain significance |
| 205219WB | NM_007194.3    | CHEK2 | c.100C>T   | p.Gln34Ter          | Heterozygous | Pathogenic        | Pathogenic                                                      |
| 205219WB | NM_001128425.1 | MUTYH | c.1187G>A  | p.Gly396Asp         | Heterozygous | Likely Pathogenic | Likely Pathogenic/Pathogenic                                    |
| 205255WB | NM_007194.4    | CHEK2 | c.470T>C   | p.Ile157Thr         | Heterozygous | Pathogenic        | Risk factor/Likely pathogenic/Pathogenic/Uncertain significance |
| PNC215   | NM_007194.4    | CHEK2 | c.470T>C   | p.Ile157Thr         | Heterozygous | Pathogenic        | Risk factor/Likely pathogenic/Pathogenic/Uncertain significance |
| PNC216   | NM_007194.4    | CHEK2 | c.470T>C   | p.Ile157Thr         | Heterozygous | Pathogenic        | Risk factor/Likely pathogenic/Pathogenic/Uncertain significance |
| PNC244   | NM_007194.4    | CHEK2 | c.470T>C   | p.Ile157Thr         | Heterozygous | Pathogenic        | Risk factor/Likely pathogenic/Pathogenic/Uncertain significance |
| PNC244   | NM_001128425.1 | MUTYH | c.1187G>A  | p.Gly396Asp         | Heterozygous | Likely Pathogenic | Likely Pathogenic/Pathogenic                                    |
| PNC461   | NM_007194.4    | CHEK2 | c.470T>C   | p.Ile157Thr         | Heterozygous | Pathogenic        | Risk factor/Likely pathogenic/Pathogenic/Uncertain significance |

|          |                |       |                  |                    |              |                   |                                                                 |
|----------|----------------|-------|------------------|--------------------|--------------|-------------------|-----------------------------------------------------------------|
| PNC469   | NM_007194.4    | CHEK2 | c.470T>C         | p.Ile157Thr        | Heterozygous | Pathogenic        | Risk factor/Likely pathogenic/Pathogenic/Uncertain significance |
| PNC49    | NM_007194.4    | CHEK2 | c.470T>C         | p.Ile157Thr        | Heterozygous | Pathogenic        | Risk factor/Likely pathogenic/Pathogenic/Uncertain significance |
| PNC513   | NM_007194.4    | CHEK2 | c.470T>C         | p.Ile157Thr        | Heterozygous | Pathogenic        | Risk factor/Likely pathogenic/Pathogenic/Uncertain significance |
| 207609WB | NM_000122.1    | ERCC3 | c.325C>T         | p.Arg109Ter        | Heterozygous | Pathogenic        | Likely Pathogenic/Pathogenic                                    |
| PNC151   | NM_000136.2    | FANCC | c.455dupA        | p.Asn152LysfsTer9  | Heterozygous | Pathogenic        | Likely Pathogenic/Pathogenic                                    |
| PNC541   | NM_000136.2    | FANCC | exon2-3 deletion |                    | Heterozygous | Pathogenic        | Pathogenic                                                      |
| PNC165   | NM_020937.3    | FANCM | c.5101C>T        | p.Gln1701Ter       | Heterozygous | Pathogenic        | Likely Pathogenic/Pathogenic/Risk factor                        |
| 207533WB | NM_000179.2    | MSH6  | c.3514dupA       | p.Arg1172LysfsTer5 | Heterozygous | Pathogenic        | Pathogenic                                                      |
| 205212WB | NM_001128425.1 | MUTYH | c.734G>A         | p.Arg245His        | Heterozygous | Likely Pathogenic | Likely Pathogenic/Pathogenic                                    |
| 205250WB | NM_001128425.1 | MUTYH | c.734G>A         | p.Arg245His        | Heterozygous | Likely Pathogenic | Likely Pathogenic/Pathogenic                                    |
| 207605WB | NM_001128425.1 | MUTYH | c.734G>A         | p.Arg245His        | Heterozygous | Likely Pathogenic | Likely Pathogenic/Pathogenic                                    |
| 207744WB | NM_001128425.1 | MUTYH | c.734G>A         | p.Arg245His        | Heterozygous | Likely Pathogenic | Likely Pathogenic/Pathogenic                                    |
| 207854WB | NM_001128425.1 | MUTYH | c.1187G>A        | p.Gly396Asp        | Heterozygous | Likely Pathogenic | Likely Pathogenic/Pathogenic                                    |
| PNC126   | NM_001128425.1 | MUTYH | c.734G>A         | p.Arg245His        | Heterozygous | Likely Pathogenic | Likely Pathogenic/Pathogenic                                    |
| PNC145   | NM_001128425.1 | MUTYH | c.734G>A         | p.Arg245His        | Heterozygous | Likely Pathogenic | Likely Pathogenic/Pathogenic                                    |

|          |                |        |                                  |                    |                   |                   |                              |
|----------|----------------|--------|----------------------------------|--------------------|-------------------|-------------------|------------------------------|
| PNC166   | NM_001128425.1 | MUTYH  | c.1437_1439delGGA                | p.Glu480del        | Heterozygous      | Pathogenic        | Pathogenic                   |
| PNC230   | NM_001128425.1 | MUTYH  | c.1171C>T                        | p.Gln391Ter        | Heterozygous      | Pathogenic        | Pathogenic                   |
| PNC264   | NM_001128425.1 | MUTYH  | c.504+19_504+31delTAGGGGGAAATAGG |                    | abnormal splicing | Heterozygous      | Likely Pathogenic/Pathogenic |
| PNC288   | NM_001128425.1 | MUTYH  | c.536A>G                         | p.Tyr179Cys        | Heterozygous      | Pathogenic        | Likely Pathogenic/Pathogenic |
| PNC319   | NM_001128425.1 | MUTYH  | c.734G>A                         | p.Arg245His        | Heterozygous      | Likely Pathogenic | Likely Pathogenic/Pathogenic |
| PNC326   | NM_001128425.1 | MUTYH  | c.1437_1439delGGA                | p.Glu480del        | Heterozygous      | Pathogenic        | Pathogenic                   |
| PNC364   | NM_001128425.1 | MUTYH  | c.1187G>A                        | p.Gly396Asp        | Heterozygous      | Likely Pathogenic | Likely Pathogenic/Pathogenic |
| PNC392   | NM_001128425.1 | MUTYH  | c.734G>A                         | p.Arg245His        | Heterozygous      | Likely Pathogenic | Likely Pathogenic/Pathogenic |
| PNC550   | NM_001128425.1 | MUTYH  | c.1437_1439delGGA                | p.Glu480del        | Heterozygous      | Pathogenic        | Pathogenic                   |
| 207527WB | NM_002485.4    | NBN    | c.657_661delACAAA                | p.Lys219AsnfsTer16 | Heterozygous      | Pathogenic        | Pathogenic                   |
| PNC487   | NM_024675.3    | PALB2  | c.2257C>T                        | p.Arg753Ter        | Heterozygous      | Pathogenic        | Pathogenic                   |
| 207013WB | NM_005732.3    | RAD50  | c.326_329delCAGA                 | p.Thr109AsnfsTer20 | Heterozygous      | Pathogenic        | Likely Pathogenic/Pathogenic |
| 207528WB | NM_005732.3    | RAD50  | c.326_329delCAGA                 | p.Thr109AsnfsTer20 | Heterozygous      | Pathogenic        | Likely Pathogenic/Pathogenic |
| PNC182   | NM_005732.3    | RAD50  | c.326_329delCAGA                 | p.Thr109AsnfsTer20 | Heterozygous      | Pathogenic        | Likely Pathogenic/Pathogenic |
| PNC481   | NM_005732.3    | RAD50  | c.326_329delCAGA                 | p.Thr109AsnfsTer20 | Heterozygous      | Pathogenic        | Likely Pathogenic/Pathogenic |
| PNC528   | NM_058216.2    | RAD51C | c.904+5G>T                       |                    | abnormal splicing | Heterozygous      | Likely Pathogenic            |
| PNC549   | NM_058216.2    | RAD51C | c.181_182delCT                   | p.Leu61AlafsTer11  | Heterozygous      | Pathogenic        | Pathogenic                   |
| PNC525   | NM_003000.2    | SDHB   | c.445C>T                         | p.Gln149Ter        | Heterozygous      | Pathogenic        | Pathogenic                   |

**Table S2.** P/LPV allele frequency analysis of low-risk PVs in comparison with their frequency in the population (comparing against population groups with the highest frequency for each P/LPV).

| Gene         | Mutation | AA change          | Patient cohort       |               |                     | Population frequency                                              |              |               | Fisher test p-value |
|--------------|----------|--------------------|----------------------|---------------|---------------------|-------------------------------------------------------------------|--------------|---------------|---------------------|
|              |          |                    | Number of PV alleles | Total alleles | PV allele frequency | PV allele frequency in population group with the highest fraction | Allele count | Allele number |                     |
| <i>MUTYH</i> | C/T      | p.Arg245His        | 9                    | 1098          | 0.008197            | 0.001166 (Bulgarian)                                              | 3            | 2572          | 1.69E-03            |
| <i>CHEK2</i> | A/G      | p.Ile157Thr        | 9                    | 1098          | 0.008197            | 0.04594 (Estonian)                                                | 222          | 4832          | 1.00E+00            |
| <i>RAD50</i> | A/-4     | p.Thr109AsnfsTer20 | 5                    | 1098          | 0.004554            | 0.002624 (Bulgarian)                                              | 7            | 2668          | 2.55E-01            |
| <i>MUTYH</i> | T/-3     | p.Glu480del        | 3                    | 1098          | 0.002732            | 0.0006085 (Southern European)                                     | 7            | 11504         | 4.9E-02             |
| <i>MUTYH</i> | C/T      | p.Gly396Asp        | 4                    | 1098          | 0.003643            | 0.006378 (North-western European)                                 | 322          | 50490         | 9.17E-01            |

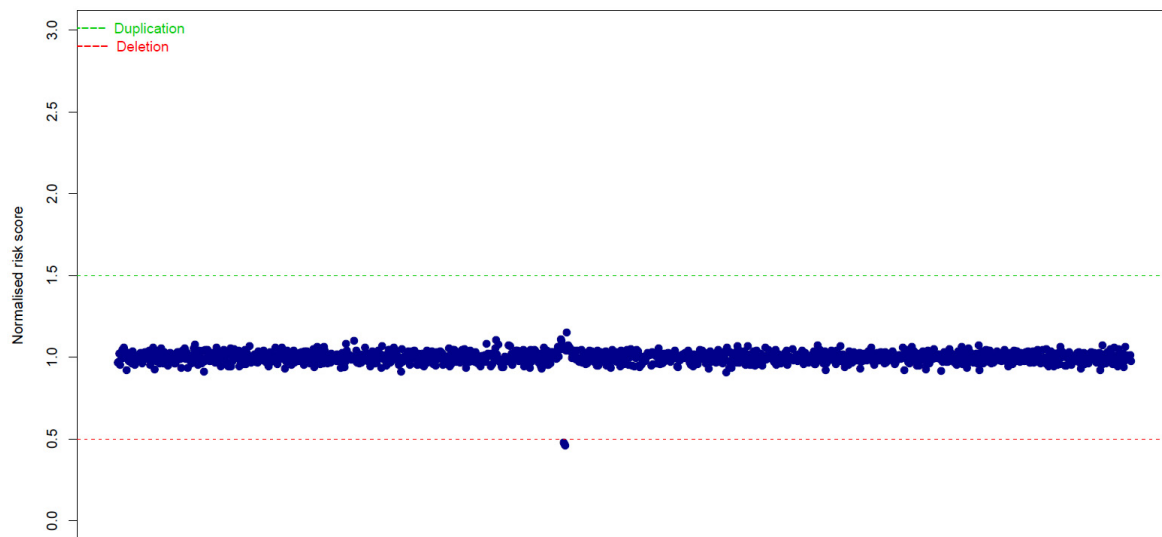

**Figure S1.** CNV-detection risk score plot for an ATM positive patient. Each dot denotes a targeted region with the y-axis representing the normalized read depth ratio (risk score) of the tested sample versus a set of normal samples. Horizontal dashed lines at  $y=1.5$  and  $y=0.5$  represent the expected risk score for a duplication and deletion, respectively.

## References

1. Koumbaris, G.; Kypri, E.; Tsangaras, K.; Achilleos, A.; Mina, P.; Neofytou, M.; Velissariou, V.; Christopoulou, G.; Kallikas, I.; González-Liñán, A.; et al. Cell-Free DNA Analysis of Targeted Genomic Regions in Maternal Plasma for Non-Invasive Prenatal Testing of Trisomy 21, Trisomy 18, Trisomy 13, and Fetal Sex. *Clin. Chem.* **2016**, *62*, 848–855, doi:10.1373/clinchem.2015.252502.
2. McKenna, A.; Hanna, M.; Banks, E.; Sivachenko, A.; Cibulskis, K.; Kernytisky, A.; Garimella, K.; Altshuler, D.; Gabriel, S.B.; Daly, M.J.; et al. The Genome Analysis Toolkit: A MapReduce framework for analyzing next-generation DNA sequencing data. *Genome Res.* **2010**, *20*, 1297–1303, doi:10.1101/gr.107524.110.
3. Richards, S.; Aziz, N.; Bale, S.; Bick, D.; Das, S.; Gastier-Foster, J.; Grody, W.W.; Hegde, M.; Lyon, E.; Spector, E.; et al. Standards and guidelines for the interpretation of sequence variants: a joint consensus recommendation of the American College of Medical Genetics and Genomics and the Association for Molecular Pathology. *Genet. Med.* **2015**, *17*, 405–423, doi:10.1038/gim.2015.30.
4. Landrum, M.J.; Lee, J.M.; Benson, M.; Brown, G.R.; Chao, C.; Chitipiralla, S.; Gu, B.; Hart, J.; Hoffman, D.; Jang, W.; et al. ClinVar: improving access to variant interpretations and supporting evidence. *Nucleic Acids Res.* **2018**, *46*, D1062–D1067, doi:10.1093/nar/gkx1153.
5. Karczewski KJ, Francioli LC, Tiao G, et al: Variation across 141,456 human exomes and genomes reveals the spectrum of loss-of-function intolerance across human protein-coding genes. bioRxiv:531210, 2019.
